# Supplementary material
Source: publisher figshare collection journal article supplement (https://acs.figshare.com/ndownloader/files/10384968)
Supplement: Supplementary file 1 [file 10384968]

# Supporting information for:

## Hole Hopping Rates in Organic Semiconductors:

### A Second Order Cumulant Approach.

Alessandro Landi,<sup>†</sup> Raffaele Borrelli,<sup>‡</sup> Amedeo Capobianco,<sup>†</sup> Amalia Velardo,<sup>†</sup>  
and Andrea Peluso<sup>\*,†</sup>

<sup>†</sup>*Dipartimento di Chimica e Biologia Adolfo Zambelli, Università di Salerno, Via Giovanni  
Paolo II, I-84084 Fisciano (SA), Italy*

<sup>‡</sup>*Department of Agricultural, Forestry and Food Science, University of Torino, I-10195  
Grugliasco, Italy*

E-mail: [apeluso@unisa.it](mailto:apeluso@unisa.it)

## Methodology adopted in TDSE simulation

We adopted a partition of the whole Hilbert space  $H$  into subspaces  $h_s$  in which only  $s$  vibrational degrees of freedom are simultaneously excited.

$$H = \bigcup_s h_s,$$

Time dependent wavefunction is then written as the sum of all the contributions belonging

to each subspace:

$$\Psi(t) = \sum_{\ell} \left[ C_{\ell,0}(t) |\ell, 0\rangle + \sum_i^N \sum_{v_i} C_{\ell,v_i}(t) |\ell, v_i\rangle + \sum_{ij}^{\binom{N}{2}} \sum_{v_i, v_j} C_{\ell,v_i, v_j}(t) |\ell, v_i, v_j\rangle + \dots \right] \quad (1)$$

and the expansion 1 is truncated when the contributions of higher dimension subspaces is lower than a given threshold. In eq.n 1,  $|\ell, 0\rangle$  is the vibrational ground state of the  $\ell$ -th electronic state and  $|\ell, v_i\rangle$  and  $|\ell, v_i, v_j\rangle$  denote states belonging to Hilbert subspaces in which only one and two vibrational degrees of freedom respectively are simultaneously excited;  $i$  and  $j$  run on the  $N$  active normal modes of the  $\ell$ -th electronic state and  $v_i$  runs on vibrational quantum numbers of the  $i$ -th mode.

The above partition stems from the observation that Franck-Condon (FC) integrals usually decrease as the number of simultaneously excited modes increases.<sup>S1-S3</sup> Since the coupling terms are proportional to FC integrals, it is reasonable to expect that vibronic states which are more effectively coupled to electronic motion are included in the subspaces with lower dimensions. Expansion 1 has been successfully used in spectroscopic problems,<sup>S1,S2</sup> and, more recently, in quantum dynamics of hole transfer in DNA oligomers.<sup>S4</sup>

Convergent time dependent populations have been usually achieved by including two subspaces ( $h_1$  and  $h_2$ ) in eq.n 1, whereas as concerns the number of basis function used for each mode seven Hermite functions for  $h_1$  and five for  $h_2$  guarantee convergence for the most difficult cases.

## SOC and TDSE comparison

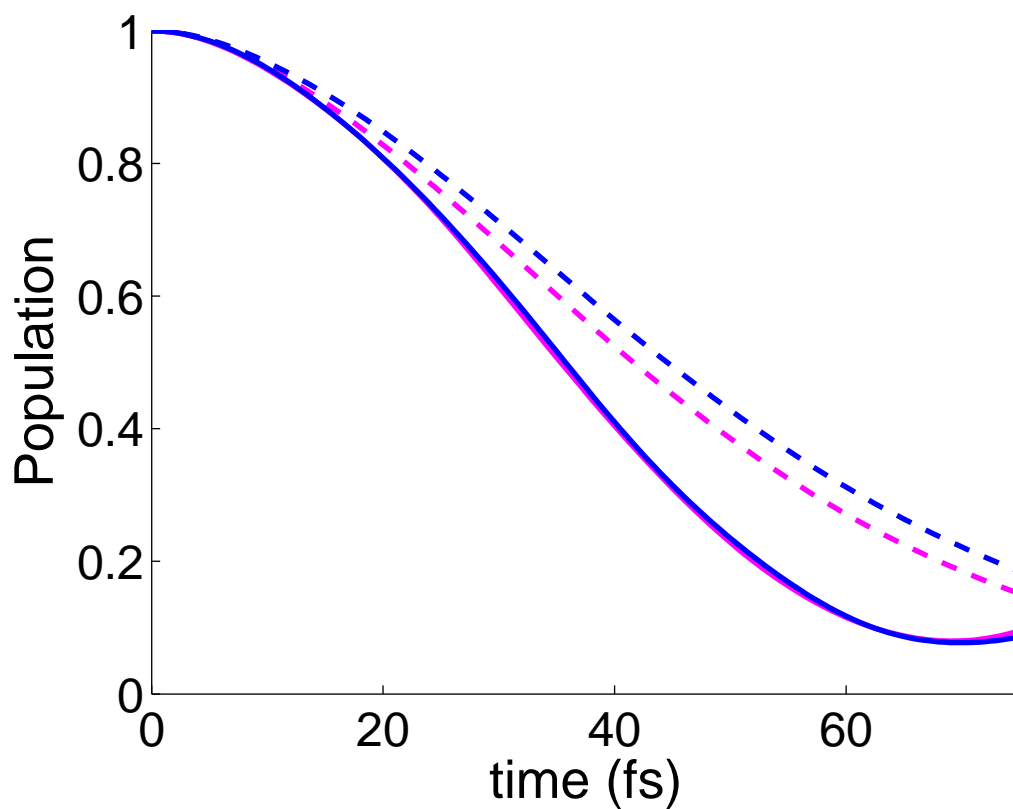

Figure S1: Comparison for the channel 2 of pentacene between time decay probabilities for hole hopping in dimers predicted by the numerical solution of the time dependent Schrödinger equation, full line, and from second order cumulant expansion of the reduced density matrix, dotted line. Initial state: equilibrium thermal population of the cationic state, magenta; equilibrium thermal population of the neutral state, blue.

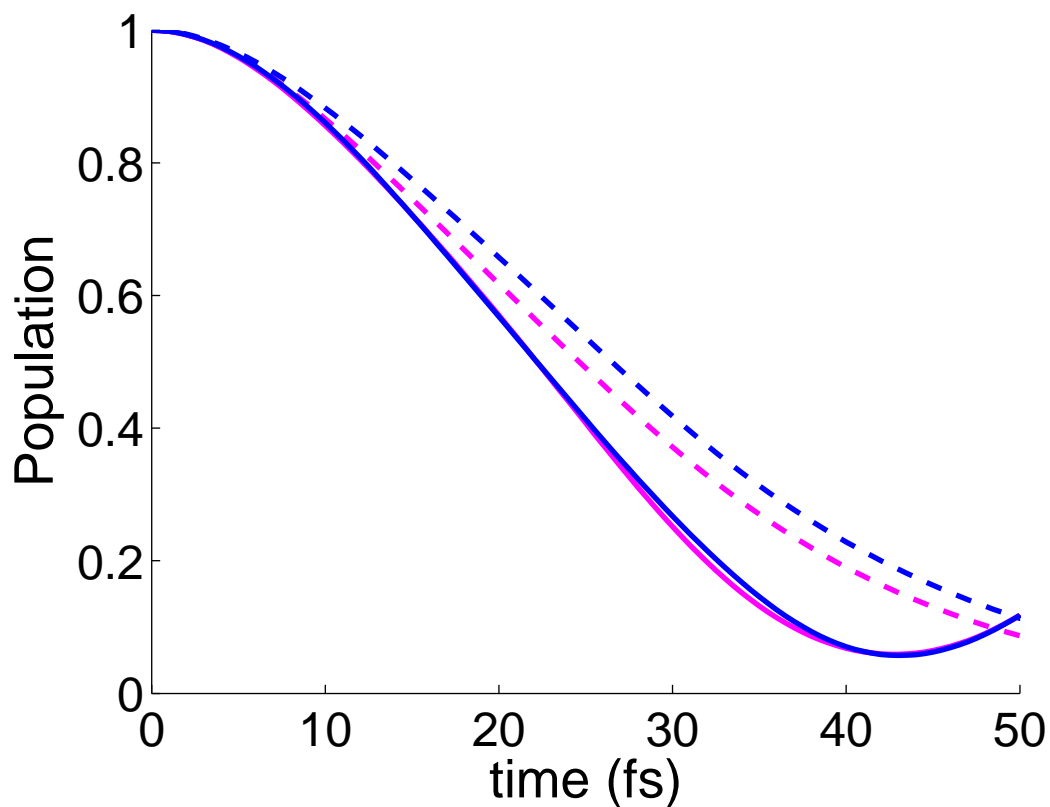

Figure S2: Comparison for the channel 3 of pentacene between time decay probabilities for hole hopping in dimers predicted by the numerical solution of the time dependent Schrödinger equation, full line, and from second order cumulant expansion of the reduced density matrix, dotted line. Initial state: equilibrium thermal population of the cationic state, magenta; equilibrium thermal population of the neutral state, blue.

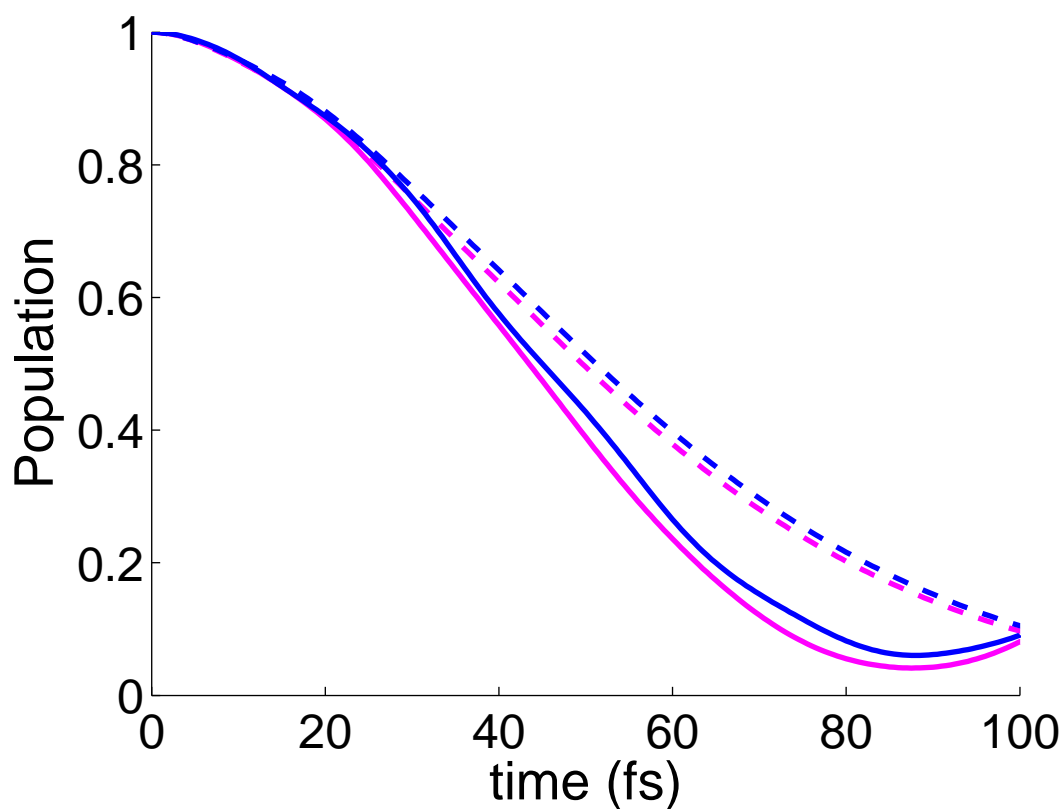

Figure S3: Comparison for the channel 1 of tetracene between time decay probabilities for hole hopping in dimers predicted by the numerical solution of the time dependent Schrödinger equation, full line, and from second order cumulant expansion of the reduced density matrix, dotted line. Initial state: equilibrium thermal population of the cationic state, magenta; equilibrium thermal population of the neutral state, blue.

# Reorganization energy in gas phase

Table S1: Frequencies ( $\omega$ ,  $\text{cm}^{-1}$ ), intramolecular reorganization energies ( $E_r$ ,  $\text{cm}^{-1}$ ), and equilibrium position displacements ( $\mathbf{K}$ ,  $\text{\AA} \text{ uma}^{-1/2}$ ) of the most displaced normal modes of pentacene/pentacene<sup>+</sup> (P/P<sup>+</sup>), picene/picene<sup>+</sup> (PC/PC<sup>+</sup>), rubrene/rubrene<sup>+</sup> (R/R<sup>+</sup>) and tetracene/tetracene<sup>+</sup> (T/T<sup>+</sup>) redox pairs.

| P/P <sup>+</sup>   |        |                | PC/PC <sup>+</sup> |        |              | R/R <sup>+</sup> |        |              | T/T <sup>+</sup> |        |              |
|--------------------|--------|----------------|--------------------|--------|--------------|------------------|--------|--------------|------------------|--------|--------------|
| $\omega$           | $E_r$  | $\mathbf{K}$   | $\omega$           | $E_r$  | $\mathbf{K}$ | $\omega$         | $E_r$  | $\mathbf{K}$ | $\omega$         | $E_r$  | $\mathbf{K}$ |
| 263                | 8.93   | -0.26          | 141                | 2.74   | -0.20        | 21               | 68.33  | -2.38        | 318              | 3.54   | -0.15        |
| 804                | 2.00   | -7.1 $10^{-2}$ | 260                | 62.34  | -0.70        | 68               | 7.76   | -0.48        | 760              | 1.50   | 0.063        |
| 1023               | 4.19   | -9.0 $10^{-2}$ | 426                | 7.86   | 0.19         | 84               | 32.36  | 0.90         | 1187             | 22.74  | -0.20        |
| 1186               | 20.57  | -0.19          | 595                | 64.32  | -0.47        | 213              | 9.38   | 0.30         | 1230             | 52.38  | 0.29         |
| 1213               | 53.82  | -0.30          | 1392               | 220.02 | 0.56         | 253              | 4.87   | -0.20        | 1420             | 26.94  | -0.20        |
| 1442               | 138.85 | -0.44          | 1657               | 147.60 | 0.42         | 996              | 21.26  | -0.20        | 1434             | 141.72 | -0.44        |
| 1564               | 81.51  | 0.32           | 1665               | 129.02 | 0.40         | 1336             | 119.27 | 0.42         | 1654             | 117.01 | -0.38        |
|                    |        |                |                    |        |              | 1586             | 11.15  | 0.37         |                  |        |              |
| $E_{r,\text{tot}}$ | 372    |                |                    | 716    |              |                  | 609    |              |                  | 440    |              |

## References

- (S1) Santoro, F.; Lami, A.; Improta, R.; Bloino, J.; Barone, V. Effective Method for the Computation of Optical Spectra of large Molecules at Finite Temperature Including the Duschinsky and Herzberg-Teller Effect: The Band of Porphyrin as a Case Study. *J. Chem. Phys.* **2008**, *128*, 224311.
- (S2) Jankowiak, H.-C.; Stuber, J. L.; Berger, R. Vibronic transitions in large molecular systems: Rigorous prescreening conditions for Franck-Condon factors. *J. Chem. Phys.* **2007**, *127*, 234101.
- (S3) Borrelli, R.; Peluso, A. The Electron Photodetachment Spectrum of  $\text{c-C}_4\text{F}_8^-$ : A Test Case for the Computation of Franck-Condon Factors of Highly Flexible Molecules. *J. Chem. Phys.* **2008**, *128*, 044303–7.
- (S4) Borrelli, R.; Capobianco, A.; Landi, A.; Peluso, A. Vibronic Couplings and Coherent Electron Transfer in Bridged Systems. *Phys. Chem. Chem. Phys.* **2015**, *17*, 30937–30945.
